# Supplementary material for: Reversible lithium-ion insertion in triclinic hydrated molybdenum oxide nanobelts
Source: Royal Society of Chemistry journal article supplement (doi:10.1039/c3ta13700g), 2013-01-01
Supplement: c3ta13700g.pdf [file c3ta13700g.pdf]

# Supporting Information

## Reversible Lithium-ion Insertion in Triclinic Hydrated Molybdenum Oxides Nanobelts

Zhengqiu Yuan\* and Lulu Si

Department of Chemistry, University of Science and Technology of  
China, Hefei, 230026, P.R. China

E-mail: [yuanzhengqiu@gmail.com](mailto:yuanzhengqiu@gmail.com)

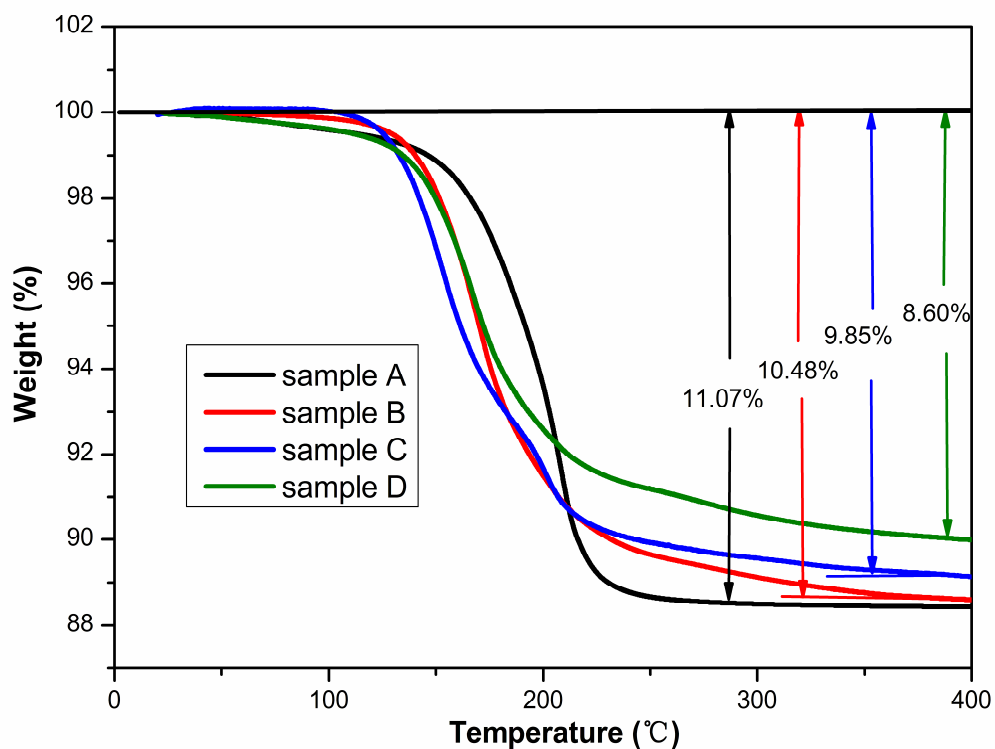

**Figure S1.** The TG curves of the four as-prepared products  $\alpha\text{-MoO}_3\cdot\text{H}_2\text{O}$  (sample A),  $\alpha\text{-MoO}_3\cdot 0.936\text{H}_2\text{O}$  (sample B),  $\alpha\text{-MoO}_3\cdot 0.874\text{H}_2\text{O}$  (sample C) and  $\alpha\text{-MoO}_3\cdot 0.752\text{H}_2\text{O}$  (sample D), respectively.

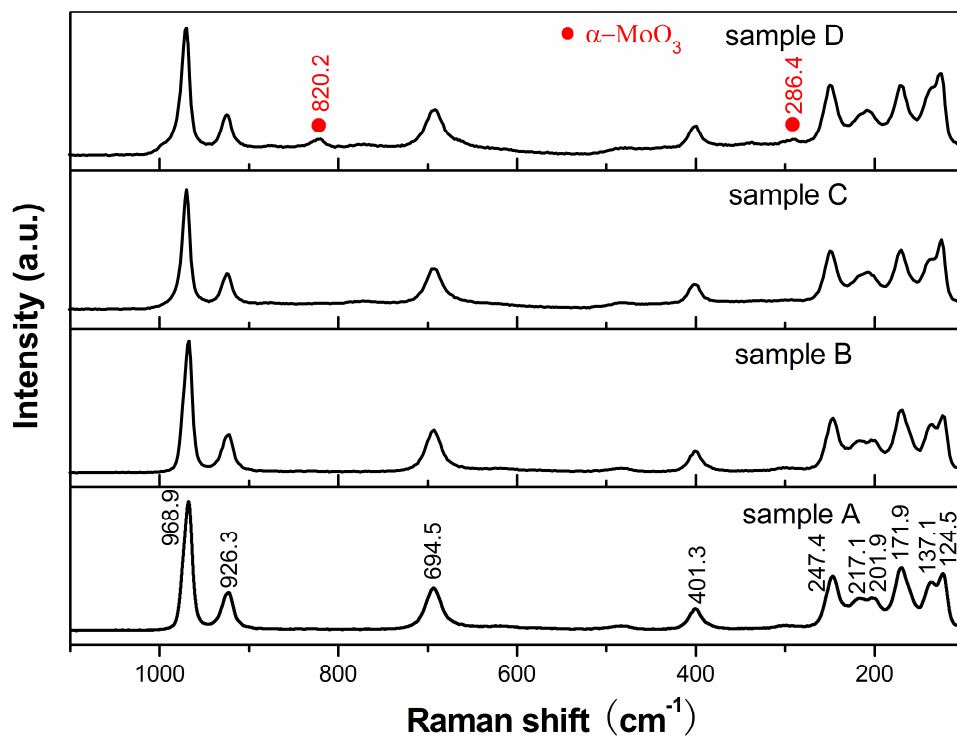

**Figure S2.** The Raman spectra of the four as-prepared products  $\alpha\text{-MoO}_3\cdot\text{H}_2\text{O}$  (sample A),  $\alpha\text{-MoO}_3\cdot 0.936\text{H}_2\text{O}$  (sample B),  $\alpha\text{-MoO}_3\cdot 0.874\text{H}_2\text{O}$  (sample C) and  $\alpha\text{-MoO}_3\cdot 0.752\text{H}_2\text{O}$  (sample D), respectively.

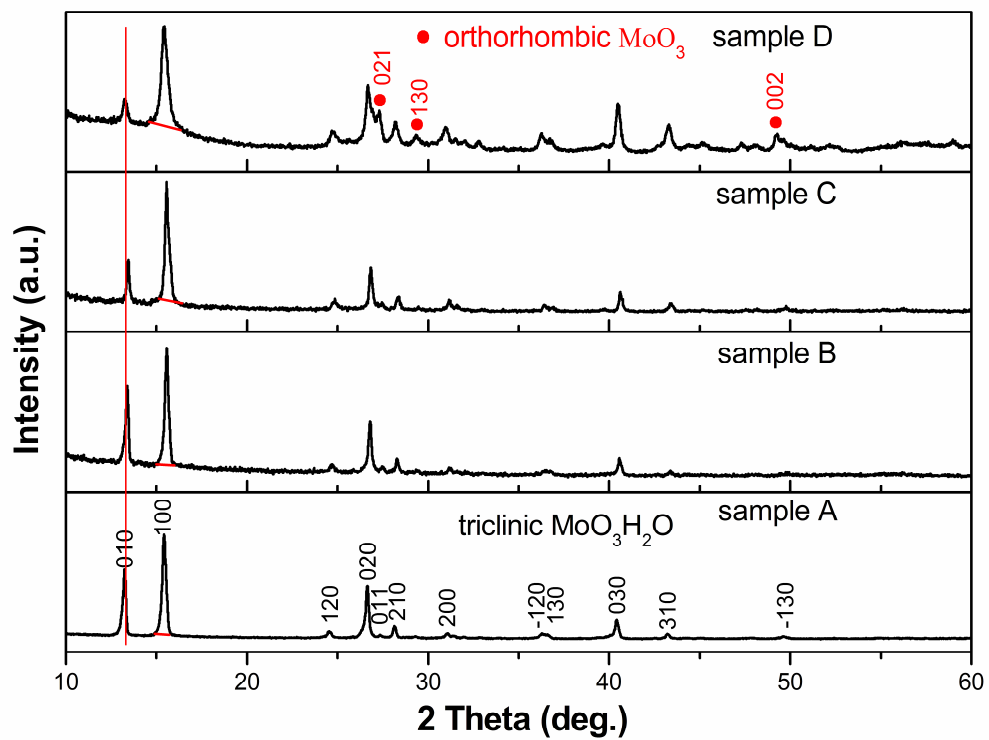

**Figure S3.** The enlarged Fig. 1a.

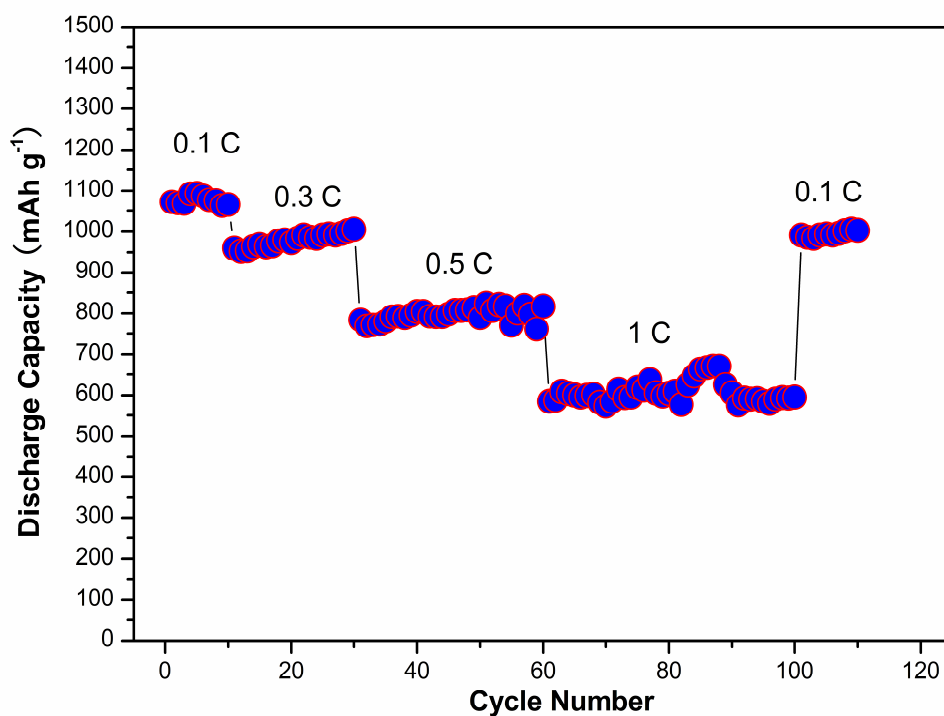

**Figure S4.** Cycling performance of the sample A at various rates (0.1, 0.3, 0.5, 1 and 0.1 C) in the potential window of 3 V- 1 mV at room temperature.

## Experimental Section

### Materials characterization

X-ray powder diffraction (XRD) measurements were determined by a Bruker D8 advanced X-ray diffractometer. The scanning electron microscopy (SEM) images were taken by using a field-emitting scanning electron microscope (FESEM, JEOL-JSM-6700F). The transmission electron microscopy (TEM) images, high-resolution transmission electron microscopy (HRTEM) images and the selected-area electron diffraction (SAED) patterns were taken on a JEOL-2010 transmission electron microscope with an accelerating voltage of 200 kV. TG analysis was carried out using a TA SDT Q600 simultaneous thermogravimetric analyzer in the ambient atmosphere. Raman spectrum was carried out on a JY LABRAM-HR confocal laser micro-Raman spectrometer using Ar<sup>+</sup> laser excitation with a wavelength of 514.5 nm.

### Electrochemical measurement

The active material (sample A, B, C or D), acetylene black and poly(vinylidene fluoride) with a weight ratio of 70:15:15 were mixed homogeneously with N-methyl-pyrrolidone, the obtained slurry was pasted on Cu foil and dried at 80 °C for 10 h in vacuum. The coin cells (size: 2016) were then assembled in an argon-filled glove box. The cells were consist of lithium foil (anode), Celgard 2400 (separator), and 1 M LiPF<sub>6</sub> in a mixed solvent of ethylene carbonate and dimethyl carbonate

(1:1 volume ratio) (electrolyte). The galvanostatic charge and discharge were controlled between 0.001 and 3.0 V on a LAND-CT2001A instrument at room temperature.
